# Supplementary material for: A lysosomal targeted NIR photosensitizer for photodynamic therapy and two-photon fluorescence imaging
Source: Royal Society of Chemistry journal article supplement (doi:10.1039/d0tb02692a), 2020-12-22
Supplement: d0tb02692a1.pdf [file d0tb02692a1.pdf]

Supporting Information

Lysosomal targeted NIR photosensitizer for photodynamic therapy and two-photon  
fluorescent imaging

*Y.P. Zhou, D. Zhang, G.H. He, C. Liu, N.R. Tu, X. Li, Q.B. Zhang\*, X. Wu\*, R.Y. Liu\**

## Contents

1. Scheme S1 The Synthesis routine of Rhodanic 1
2. Fig. S1 The  $^1\text{H}$  NMR of Rhodanic 1
3. Fig. S2 The  $^{13}\text{C}$  NMR of Rhodanic 1
4. Fig. S3 The  $^1\text{H}$  NMR of TTRh-CN
5. Fig. S4 The  $^{13}\text{C}$  NMR of TTRh-CN
6. Fig. S5 The IR Spectrum of TTRh-CN
7. Fig. S6 The Mass Spectrum of TTRh-CN
8. Fig. S7 The absorption spectra of TTRh-CN before and after irradiation ( $300\text{mW}/\text{cm}^2$ , 10min)
9. Fig. S8 The photostability of TTRh-CN *in vitro*
10. Fig. S9 The cell viability of TTRh-CN in dark or upon irradiation
11. Fig. S10 ROS generation of TTRh-CN ( $2\mu\text{M}$ ) upon light irradiation ( $60\text{mW}/\text{cm}^2$ ) using dichlorofluorescein diacetate as an indicator.
12. Fig. S11 Survival rates of the mice receiving various injections

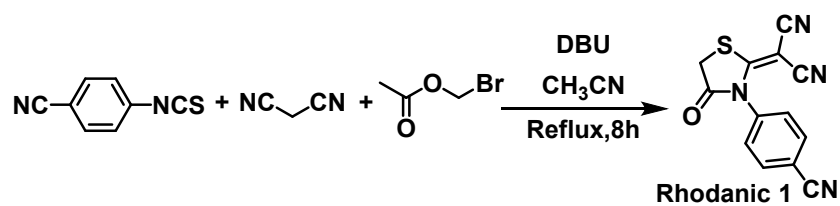

Scheme S1 The Synthesis routine of Rhodanic 1

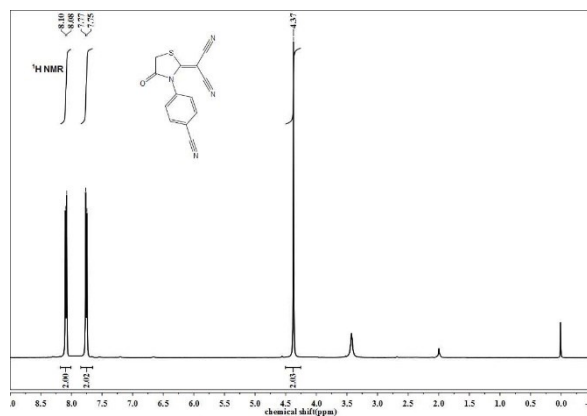

Fig. S1 The  $^1\text{H}$  NMR of Rhodanic 1

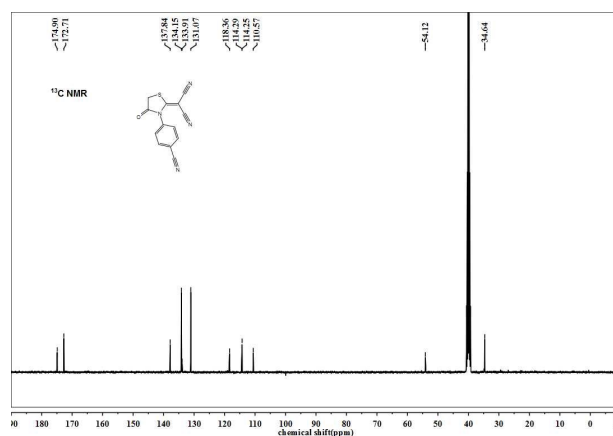

Fig. S2 The  $^{13}\text{C}$  NMR of Rhodanic 1

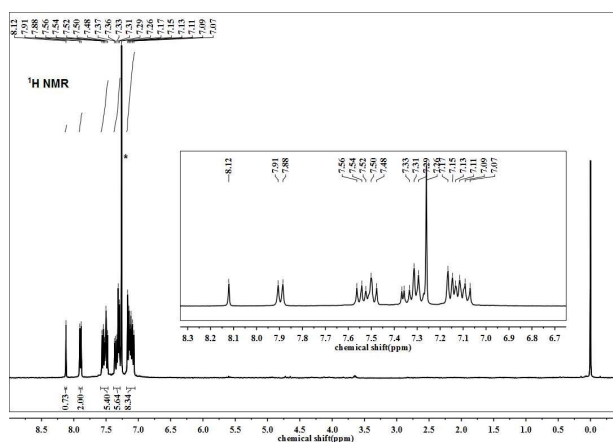

Fig. S3 The  $^1\text{H}$  NMR of TTRh-CN

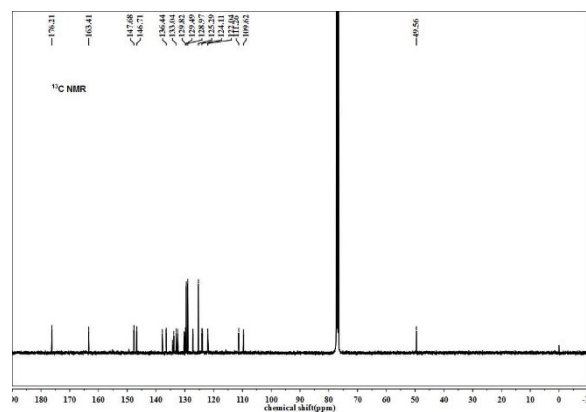

Fig. S4 The  $^{13}\text{C}$  NMR of TTRh-CN

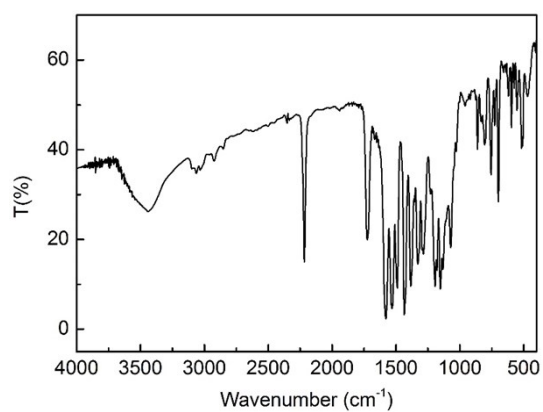

Fig. S5 The IR Spectrum of TTRh-CN

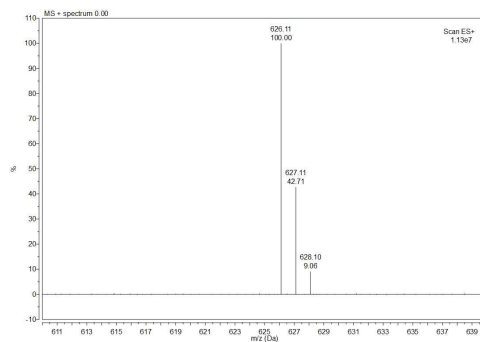

Fig. S6 The Mass Spectrum of TTRh-CN

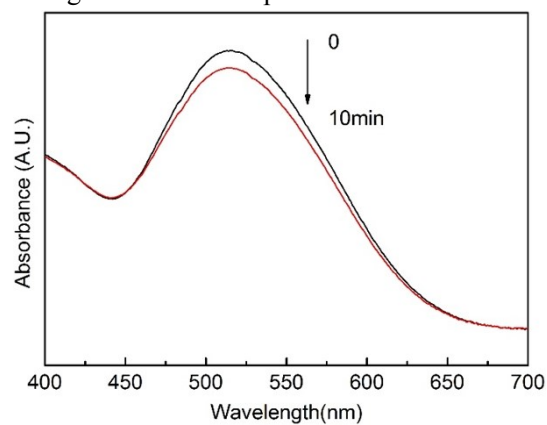

Fig. S7 The absorption spectra of TTRh-CN before and after irradiation ( $300\text{mW}/\text{cm}^2$ , 10min)

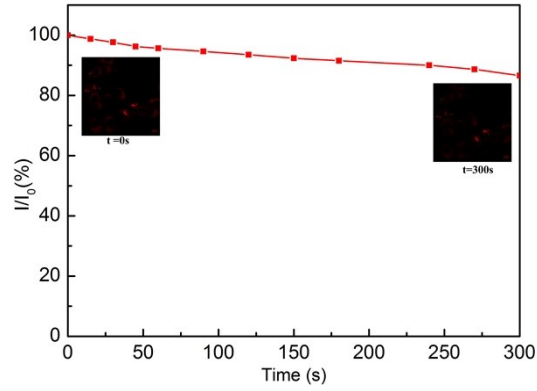

Fig. S8 The photostability of TTRh-CN *in vitro*

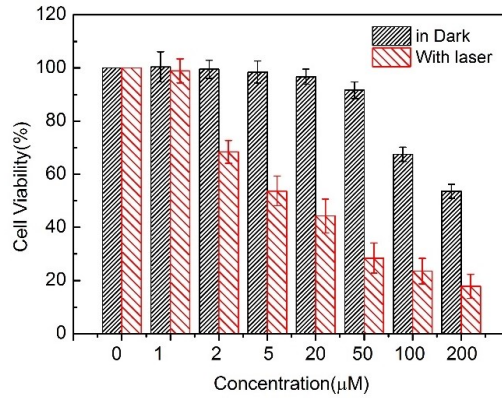

Fig. S9 The cell viability of TTRh-CN in dark or upon irradiation

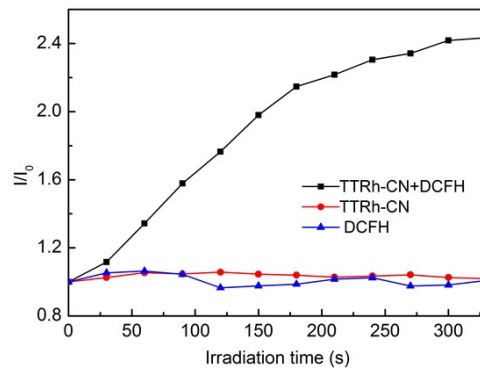

Fig. S10 ROS generation of TTRh-CN(2  $\mu\text{M}$ ) upon light irradiation (60  $\text{mW}/\text{cm}^2$ ) using dichlorofluorescein diacetate as an indicator.

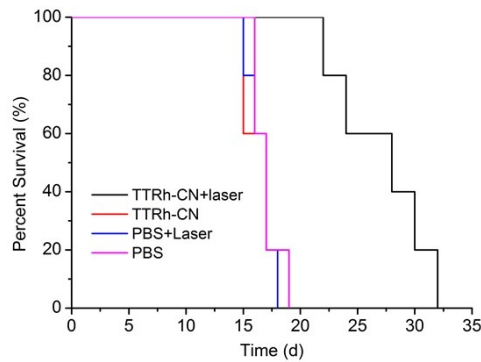

Fig. S11 Survival rates of the mice receiving various treatment
